# Supplementary material for: Translational autoregulation of BZW1 and BZW2 expression by modulating the stringency of start codon selection
Source: PubMed Central journal article supplement (PMC5823381; doi:10.1371/journal.pone.0192648), 2018-02-22
Supplement: pone.0192648.s003.pdf [file pone.0192648.s003.pdf]

**S1 Table**

| Oligo # | Oligo name  | Sequence (5' – 3')                               |
|---------|-------------|--------------------------------------------------|
| 1       | BZW1FL/S1   | GTAGTCTTTTATGACCG                                |
| 2       | BZW1FL/A1   | GATCCGGTCATAAAAGACTACTGCA                        |
| 3       | BZW2FL/S1   | GTAGAATTTTATGACCG                                |
| 4       | BZW2FL/A1   | GATCCGGTCATAAAATTCTACTGCA                        |
| 5       | BZW1/S1     | CGCGCTAGCTAGTCTTTTATGAATAATCAAAGCAGCAAAGC        |
| 6       | BZW1AUGB/S2 | CGCGCTAGCTAGGCCACCATGAATAATCAAAGCAGCAAAGCCAACGCT |
| 7       | BZW1/A1     | CGCTCTAGACACTCAGTCACCTTCTTCAGCTTCAGATTC          |
| 8       | BZW2/S1     | CGCGCTAGCTGAAATTTTATGAATAAGCATCAGAAGCCAGTG       |
| 9       | BZW2AUGB/S2 | CGCGCTAGCTGAGGCCACCATGAATAAGCATCAGAAGCCAGTGCTAAC |
| 10      | BZW2/A1     | CGCTCTAGACACTTAATTTTCTCACCTTCCGATTCGGATTC        |
